# Supplementary material for: Highly [001]-oriented N-doped orthorhombic Nb2O5 microflowers with intercalation pseudocapacitance for lithium-ion storage
Source: Royal Society of Chemistry journal article supplement (doi:10.1039/d2nr03187f), 2022-01-01
Supplement: d2nr03187f1.pdf [file d2nr03187f1.pdf]

## Supporting Information of

# Highly [001]-Oriented N-doped Orthorhombic Nb<sub>2</sub>O<sub>5</sub> Microflowers with Intercalation Pseudocapacitance for Lithium-ion Storage

Guangyin Liu,<sup>a</sup> Shanshan Liu,<sup>a</sup> Hao Chen,<sup>a</sup> Xiaodi Liu,<sup>a\*</sup> Xinwei Luo,<sup>a</sup> Xiu Li,<sup>b\*</sup> and Jianmin Ma<sup>b</sup>

<sup>a</sup> College of Chemistry and Pharmaceutical Engineering, Nanyang Normal University, Nanyang 473061, China

<sup>b</sup> School of Materials and Energy, University of Electronic Science and Technology of China, Chengdu 611731,  
China

\*Corresponding author: E-mail: liuxiaodiny@126.com (X. Liu); x.li@uestc.edu.cn (X. Li).

## **Structural characterization and electrochemical measurements of N-doped orthorhombic Nb<sub>2</sub>O<sub>5</sub> microflowers (N-Nb<sub>2</sub>O<sub>5</sub>) and orthorhombic Nb<sub>2</sub>O<sub>5</sub> microspheres (Nb<sub>2</sub>O<sub>5</sub>-MS):**

The crystal structures of Nb<sub>2</sub>O<sub>5</sub>-MS and N-Nb<sub>2</sub>O<sub>5</sub> are recorded in the range of 10-70° (2 $\theta$ ) on a X-ray diffractometer (XRD, Rigaku D/max-2500) using Cu K $\alpha$  radiation. The morphologies and nanostructures of samples are tested by scanning electron microscopy (SEM, ZEISS sigma-500), transmission electron microscopy (TEM, JEM-2100F), and high-resolution transmission electron microscopy (HRTEM, JEM-2100F). The special BET surface areas of samples are examined by N<sub>2</sub> adsorption-desorption isotherms at 77 K on a Micromeritics Autosorb-iQ apparatus. X-ray photoelectron spectra (XPS) are performed by Thermo ESCALAB 250XI electron spectrometer (Al K $\alpha$ ). The binding energies of the peaks are calibrated by setting the adventitious C 1s peak at a fixed value of 284.5 eV and fitted by the XPSPEAK41 fitting software. UV-Vis diffuse reflectance spectra (DRS) of the samples in the wavelength range of 300-750 nm are recorded on a UV-vis spectrophotometer (Hitachi U-3010), using BaSO<sub>4</sub> as the background.

The active anodic materials (Nb<sub>2</sub>O<sub>5</sub>-MS and N-Nb<sub>2</sub>O<sub>5</sub>), acetylene black, and polyvinylidene fluoride with a ratio of 70:20:10 wt% are mixed in N-methyl-2-pyrrolidone. Then, the slurry is uniformly coated on Cu foils and dried in vacuum (120 °C, 12 h). Subsequently, the electrodes are assembled into CR2025 coin-type cells in an Argon-filled glove box. Li is served as the counter and reference electrode. The loading amount of the electrode is about 2.0 mg cm<sup>-2</sup>. The electrolyte is 1 mol L<sup>-1</sup> LiPF<sub>6</sub> in ethylene carbonate, ethyl methyl carbonate, and diethyl carbonate (1:1:1 vol%). Galvanostatic measurements are evaluated by a LAND CT2001A battery tester. Cyclic voltammetry (CV) measurements are carried out on a CHI660D Electrochemical Workstation. Electrochemical impedance spectroscopy (EIS) tests are performed on a Solatron 1260 Impedance Analyzer with potentiostatic signal amplitude of 10 mV.

**Tab. S1.** The crystal lattice parameters of Nb<sub>2</sub>O<sub>5</sub>-MS and N-Nb<sub>2</sub>O<sub>5</sub>.

| Samples                            | <i>a</i> (Å) | <i>b</i> (Å) | <i>c</i> (Å) | <i>V</i> (Å <sup>3</sup> ) |
|------------------------------------|--------------|--------------|--------------|----------------------------|
| Nb <sub>2</sub> O <sub>5</sub> -MS | 6.1702       | 29. 1645     | 3.9014       | 702.74                     |
| N-Nb <sub>2</sub> O <sub>5</sub>   | 6.1752       | 29. 2092     | 3.9288       | 708.64                     |

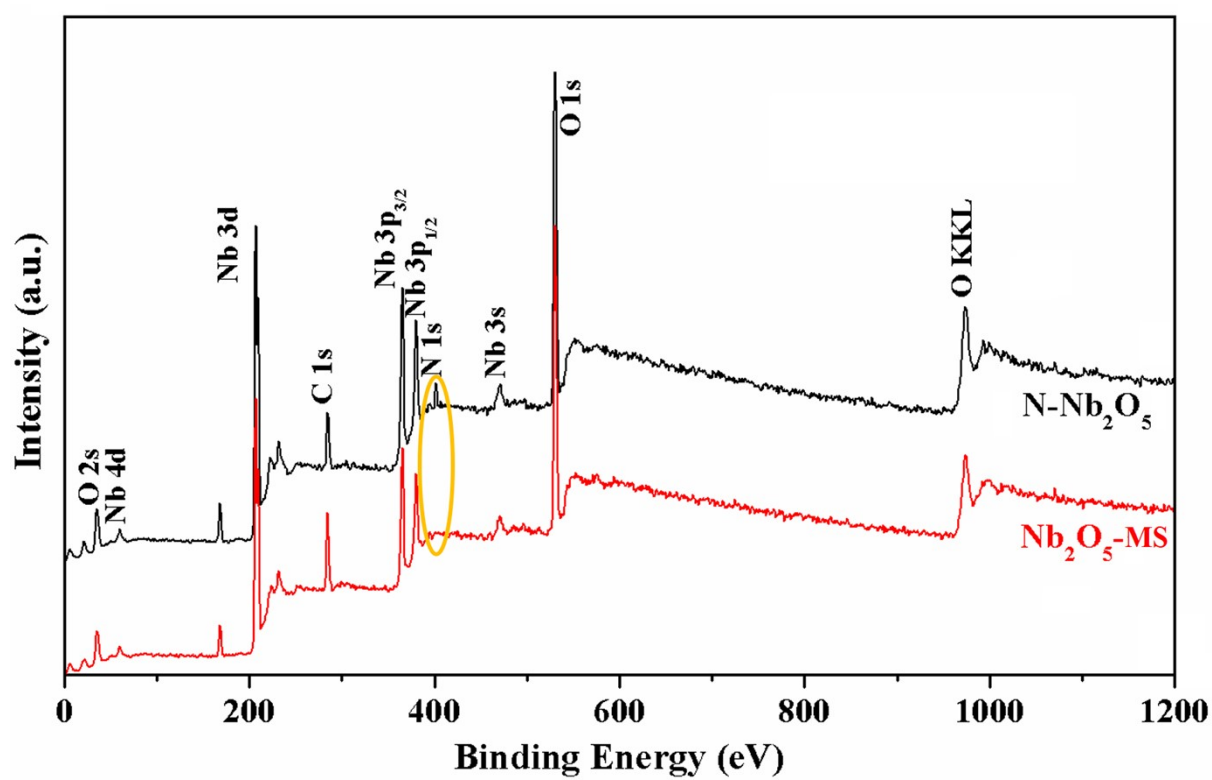

**Fig. S1.** XPS spectra of N-Nb<sub>2</sub>O<sub>5</sub> and Nb<sub>2</sub>O<sub>5</sub>-MS.

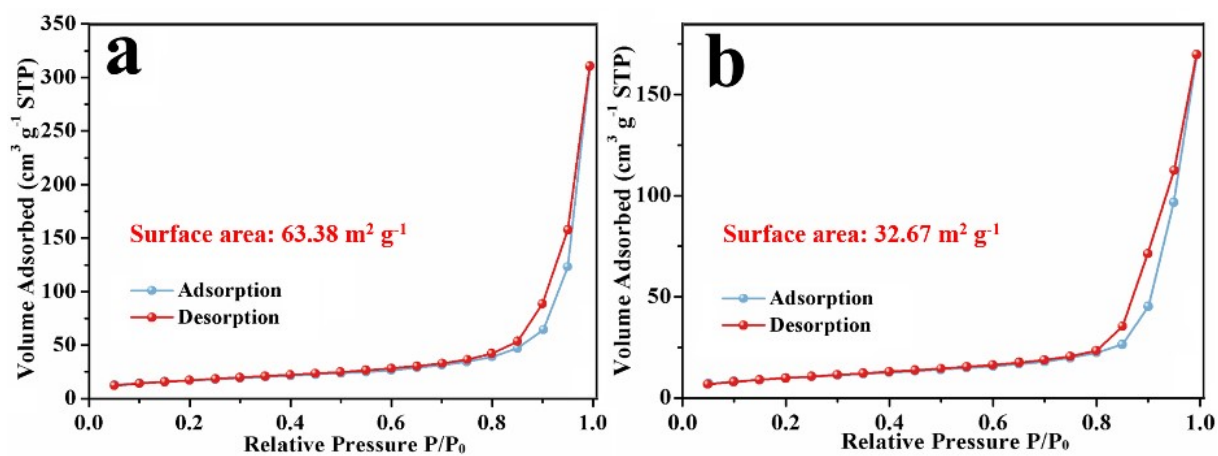

**Fig. S2.** Nitrogen adsorption-desorption isotherms of (a) N-Nb<sub>2</sub>O<sub>5</sub> and (b) Nb<sub>2</sub>O<sub>5</sub>-MS.

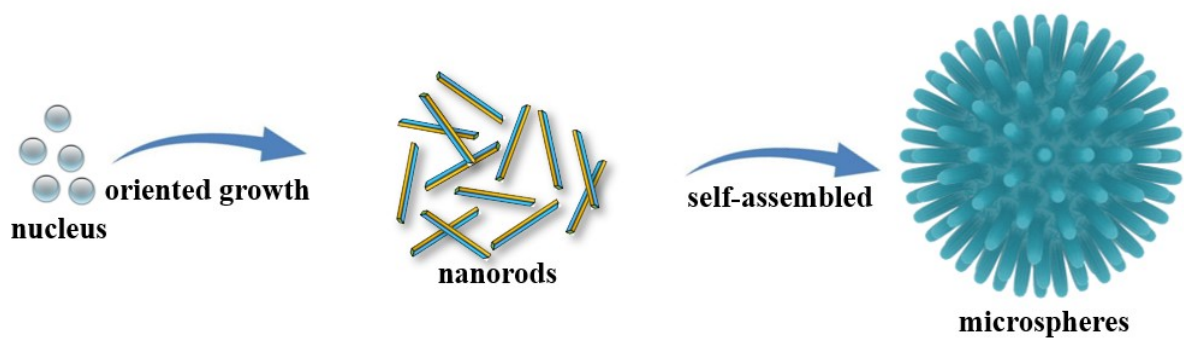

**Fig. S3.** The possible formation process of Nb<sub>2</sub>O<sub>5</sub>-MS.

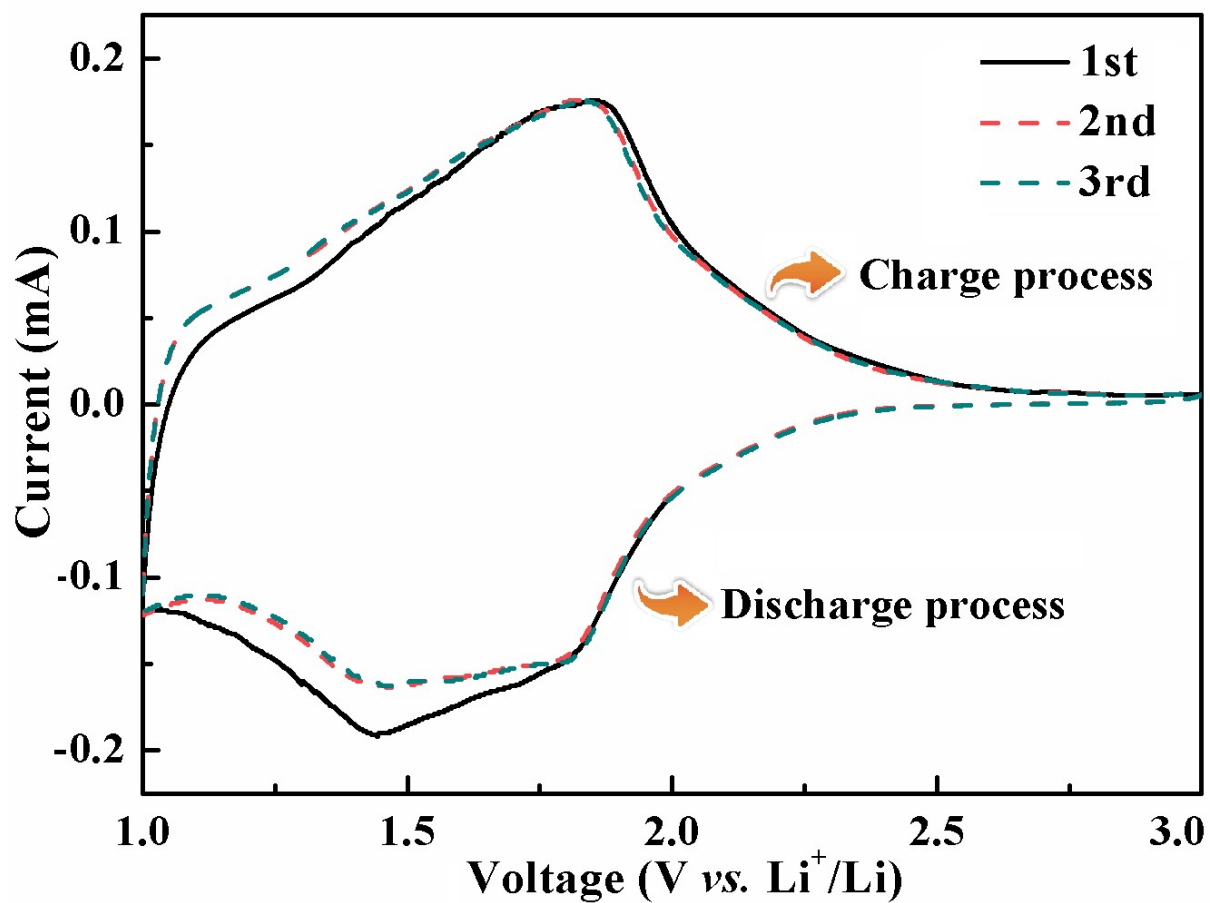

**Fig. S4.** The initial three CV curves of N-Nb<sub>2</sub>O<sub>5</sub> in a voltage range of 1.0-3.0 V (vs. Li/Li<sup>+</sup>) at a scan rate of 0.1 mV s<sup>-1</sup>.

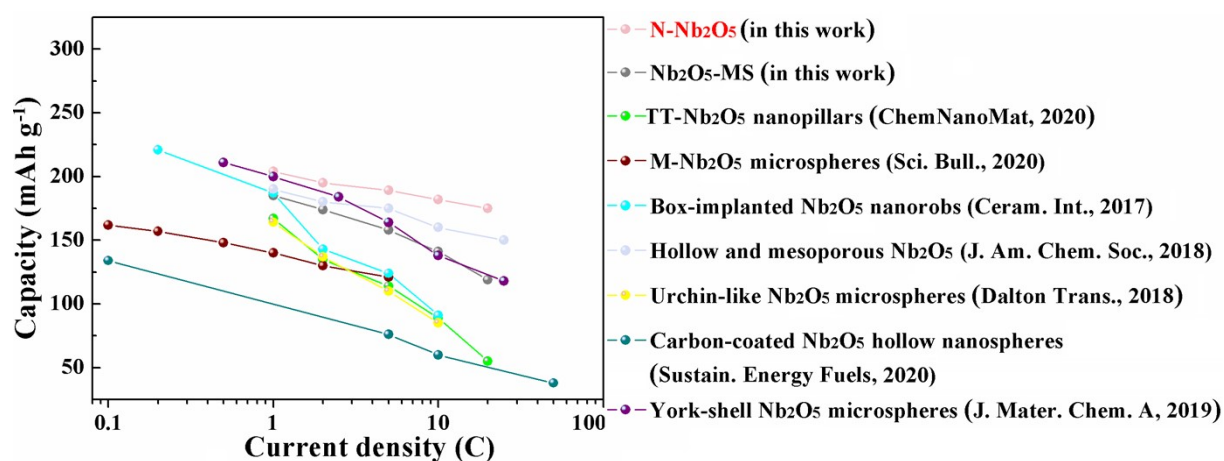

**Fig. S5.** The comparison of the rate capabilities between the obtained N-Nb<sub>2</sub>O<sub>5</sub>, Nb<sub>2</sub>O<sub>5</sub>-MS, and other previously reported Nb<sub>2</sub>O<sub>5</sub>-based anodes.

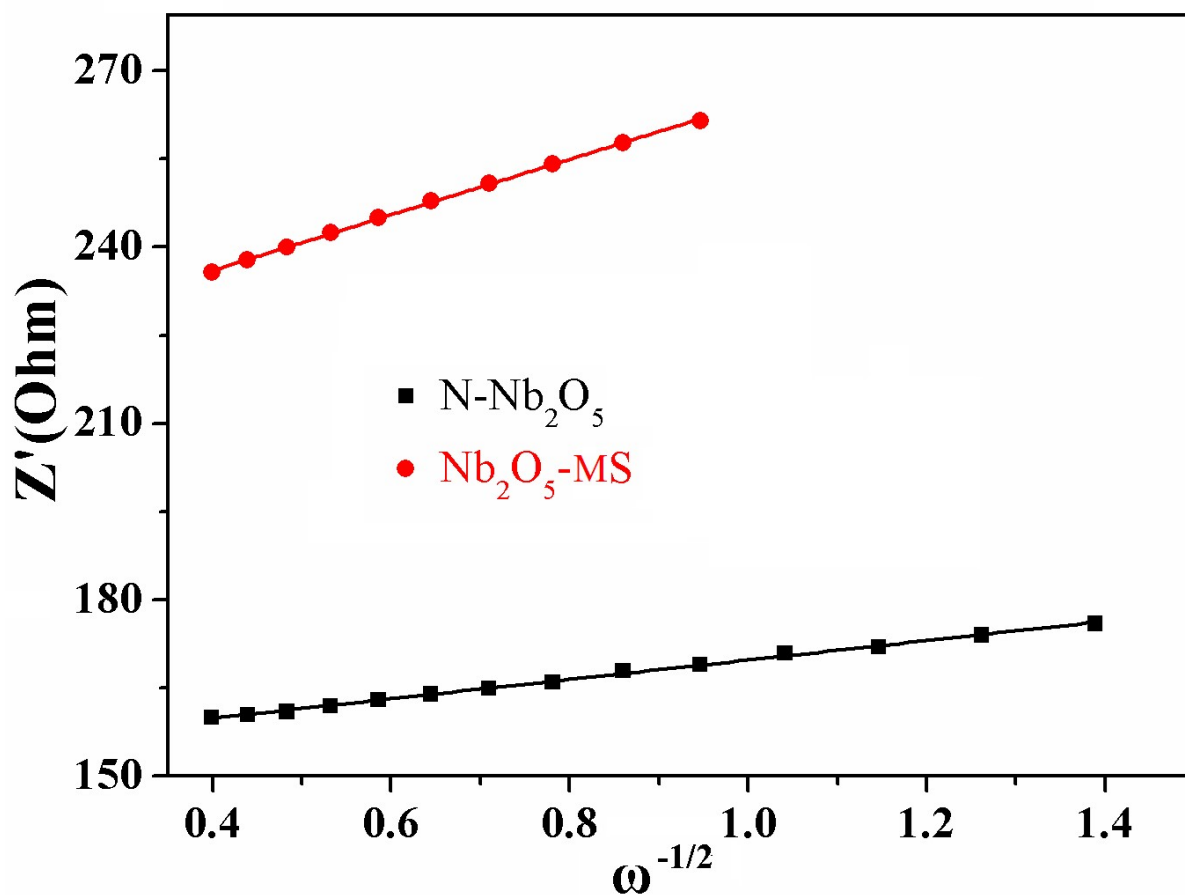

**Fig. S6.** Relationship between imaginary resistance ( $Z'$ ) and inverse square root of angular speed ( $\omega^{-0.5}$ ) at low frequency region.

Based on the slopes of the  $Z'-\omega^{-0.5}$  plots (Fig. S5), the  $\sigma$  value of Nb<sub>2</sub>O<sub>5</sub>-MS is larger than that of N-Nb<sub>2</sub>O<sub>5</sub>, so the calculated Li<sup>+</sup> ions diffusion coefficient of Nb<sub>2</sub>O<sub>5</sub>-MS is smaller than that of N-Nb<sub>2</sub>O<sub>5</sub>.

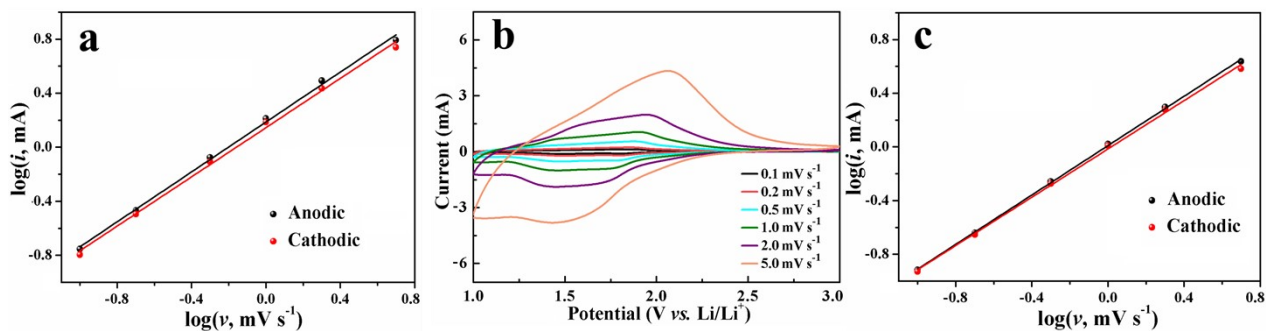

**Fig. S7.** (a) Plots of  $\log(i)$  vs.  $\log(v)$  used to calculate  $b$ -values of N-Nb<sub>2</sub>O<sub>5</sub>; (b) cyclic voltammograms of Nb<sub>2</sub>O<sub>5</sub>-MS at different scanning rates with potential window of 1.0-3.0 V vs. Li/Li<sup>+</sup>; (c) plots of  $\log(i)$  vs.  $\log(v)$  used to calculate  $b$ -values of Nb<sub>2</sub>O<sub>5</sub>-MS.

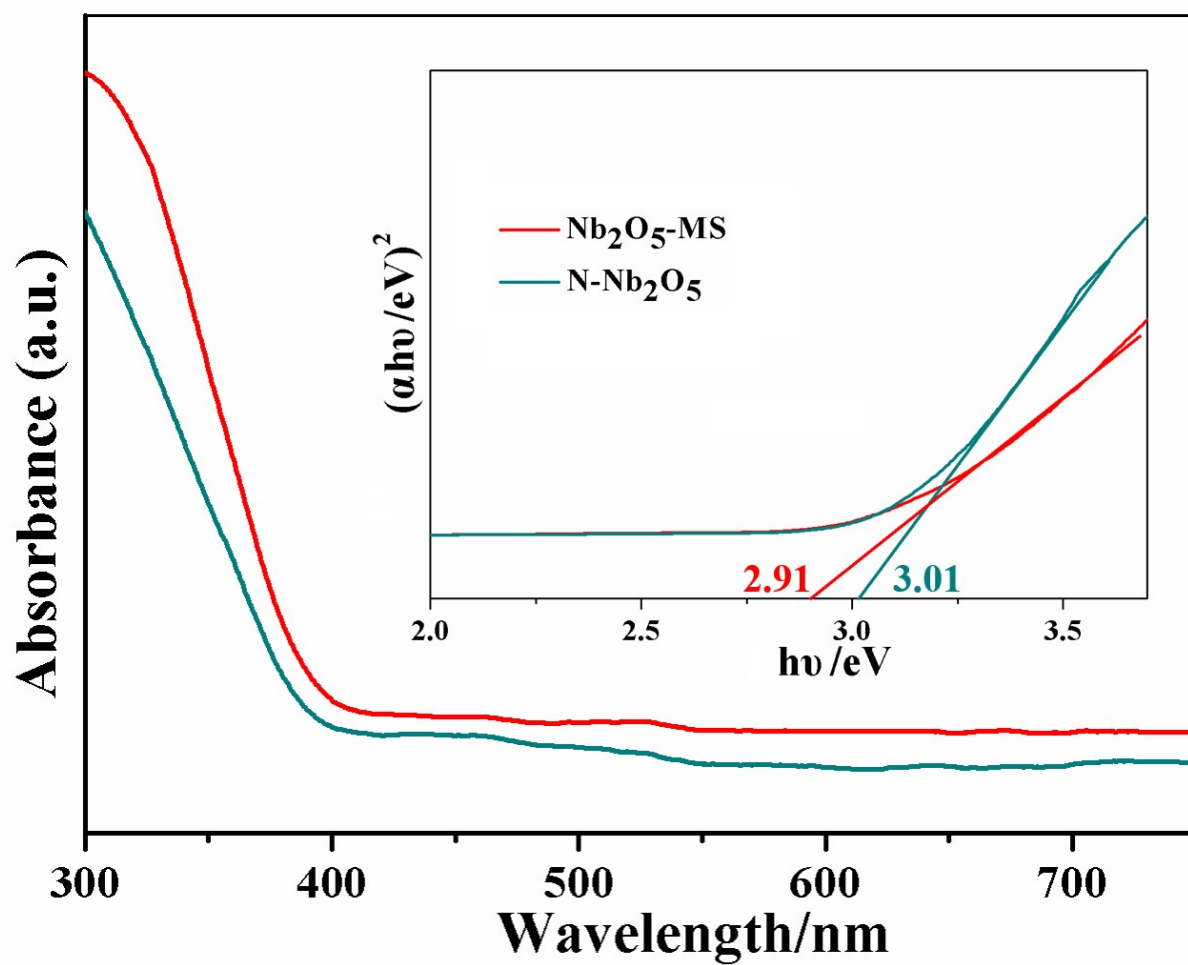

**Fig. S8.** UV-Vis diffuse reflectance spectra and the corresponding Tauc's curves of  $\text{N-Nb}_2\text{O}_5$  and  $\text{Nb}_2\text{O}_5\text{-MS}$ .

**Tab. S2.** Electrochemical performance of full cells with Nb-based anodes

| Full cell systems                                                                                                       | Discharge capacity                                                                                   | Cyclability                                                      | Ref.      |
|-------------------------------------------------------------------------------------------------------------------------|------------------------------------------------------------------------------------------------------|------------------------------------------------------------------|-----------|
| <b>LiNi<sub>0.5</sub>Mn<sub>0.3</sub>Co<sub>0.2</sub>O<sub>4</sub>  N-Nb<sub>2</sub>O<sub>5</sub></b>                   | 232.8 mAh g <sup>-1</sup> (1 C)<br>141.3 mAh g <sup>-1</sup> (10 C)                                  | 126.2 mAh g <sup>-1</sup><br>(3500 cycles, 10 C)                 | This work |
| <b>LiNi<sub>0.5</sub>Mn<sub>0.3</sub>Co<sub>0.2</sub>O<sub>4</sub>  Al<sub>0.5</sub>Nb<sub>24.5</sub>O<sub>62</sub></b> | 143 mAh g <sup>-1</sup> (1 C)<br>78 mAh g <sup>-1</sup> (10 C)                                       | 69.6 mAh g <sup>-1</sup><br>(800 cycles, 10 C)                   | 1         |
| <b>LiMn<sub>2</sub>O<sub>4</sub>//MoNb<sub>6</sub>O<sub>18</sub></b>                                                    | 196.3 mAh g <sup>-1</sup> (0.2 C)                                                                    | 152 mAh g <sup>-1</sup><br>(30 cycles, 0.2 C)                    | 2         |
| <b>LiNi<sub>0.5</sub>Mn<sub>1.5</sub>O<sub>4</sub>  HfNb<sub>24</sub>O<sub>62</sub></b>                                 | 213 mAh g <sup>-1</sup> (0.1 C)<br>78 mAh g <sup>-1</sup> (10 C)                                     | ~75 mAh g <sup>-1</sup><br>(500 cycles, 5 C)                     | 3         |
| <b>LiFePO<sub>4</sub>  TiNb<sub>2</sub>O<sub>7</sub></b>                                                                | 198.1 mAh g <sup>-1</sup> (1 A g <sup>-1</sup> )<br>127.8 mAh g <sup>-1</sup> (5 A g <sup>-1</sup> ) | 131.2 mAh g <sup>-1</sup><br>(2000 cycles, 2 A g <sup>-1</sup> ) | 4         |
| <b>LiNi<sub>0.5</sub>Mn<sub>1.5</sub>O<sub>4</sub>  Zn<sub>2</sub>Nb<sub>34</sub>O<sub>87</sub>-N</b>                   | 236 mAh g <sup>-1</sup> (0.1 C)                                                                      | 97.8 mAh g <sup>-1</sup><br>(1000 cycles, 5 C)                   | 5         |
| <b>LiMn<sub>2</sub>O<sub>4</sub>  MoNb<sub>12</sub>O<sub>33</sub></b>                                                   | 234 mAh g <sup>-1</sup> (0.1 C)<br>95 mAh g <sup>-1</sup> (10 C)                                     | 108.9 mAh g <sup>-1</sup><br>(1000 cycles, 5 C)                  | 6         |
| <b>LiMn<sub>2</sub>O<sub>4</sub>  V<sub>3</sub>Nb<sub>17</sub>O<sub>50</sub></b>                                        | 102 mAh g <sup>-1</sup> (1 C)<br>61 mAh g <sup>-1</sup> (10 C)                                       | 62.6 mAh g <sup>-1</sup><br>(500 cycles, 5 C)                    | 7         |
| <b>LiMn<sub>2</sub>O<sub>4</sub>  IO-Cu<sub>2</sub>Nb<sub>34</sub>O<sub>87</sub></b>                                    | 229 mAh g <sup>-1</sup> (0.1 C)<br>106 mAh g <sup>-1</sup> (10 C)                                    | 99.3 mAh g <sup>-1</sup><br>(500 cycles, 10 C)                   | 8         |
| <b>LiNi<sub>0.5</sub>Mn<sub>0.3</sub>Co<sub>0.2</sub>O<sub>2</sub>  Ti<sub>2</sub>Nb<sub>10</sub>O<sub>29</sub>@F-C</b> | 196 mAh g <sup>-1</sup> (1 C)<br>111 mAh g <sup>-1</sup> (10 C)                                      | 70 mAh g <sup>-1</sup><br>(500 cycles, 10 C)                     | 9         |

[1] Q. Fu, R. Li, X. Zhu, G. Liang, L. Luo, Y. Chen, C. Lin, X.S. Zhao, Design, synthesis and lithium-ion storage capability of Al<sub>0.5</sub>Nb<sub>24.5</sub>O<sub>62</sub>, J. Mater. Chem. A, 2019, 7, 19862-19871.

[2] J. Cheng, F. Lu, X. Kuang, Shear-structured MoNb<sub>6</sub>O<sub>18</sub> as a new anode for lithium-ion batteries, Mater. Adv., 2021, 2, 6272-6277.

[3] Q. Fu, H. Cao, G. Liang, L. Luo, Y. Chen, V. Murugadoss, S. Wu, T. Ding, C. Lin, Z. Guo, A highly Li<sup>+</sup>-conductive HfNb<sub>24</sub>O<sub>62</sub> anode material for superior Li<sup>+</sup> storage, Chem. Commun., 2020, 56, 619-622.

[4] L. Yu, J. Lv, Z. Zhou, Y. Li, M. Wei, Hierarchical structure TiNb<sub>2</sub>O<sub>7</sub> microspheres derived from titanate for high-performance lithium-ion batteries, CrystEngComm, 2021, 23, 4905-4909.

[5] X. Zhu, H. Cao, R. Li, Q. Fu, G. Liang, Y. Chen, L. Luo, C. Lin, X.S. Zhao, Zinc niobate materials: crystal structures, energy-storage capabilities and working mechanisms, J. Mater. Chem. A, 2019, 7, 25537-25547.

[6] X. Zhu, J. Xu, Y. Luo, Q. Fu, G. Liang, L. Luo, Y. Chen, C. Lin, X.Z. Zhao, MoNb<sub>12</sub>O<sub>33</sub> as a new anode material for high-capacity, safe, rapid and durable Li<sup>+</sup> storage: structural characteristics, electrochemical properties and working mechanisms, J. Mater. Chem. A, 2019, 7, 6522-6532.

- [7] Q. Fu, X. Zhu, R. Li, G. Liang, L. Luo, Y. Chen, Y. Ding, C. Lin, K. Wang, X.S. Zhao, A low-strain  $V_3Nb_{17}O_{50}$  anode compound for superior  $Li^+$  storage, *Energy Storage Mater.* 2020, 30, 401-411.
- [8] X. Zhu, G. Liang, Q. Fu, R. Li, Y. Chen, Y. Bi, D. Pan, R. Das, C. Lin, Z. Guo, An inverse opal  $Cu_2Nb_{34}O_{87}$  anode for high-performance  $Li^+$  storage, *Chem. Commun.*, 2020, 56, 7321-7324.
- [9] X. Ji, Y. Yang, Y. Ding, Z. Lu, G. Liu, Y. Liu, J. Song, Z. Yang, X. Liu, Fluorine-doped carbon-coated mesoporous  $Ti_2Nb_{10}O_{29}$  microspheres as a high-performance anode for lithium-ion batteries, *J. Phys. Chem. C*, 2022, 126, 7799-7808.
